# Supplementary material for: Intensive chemotherapy versus standard chemotherapy among patients with high risk, operable, triple negative breast cancer based on integrated mRNA-lncRNA signature (BCTOP-T-A01): randomised, multicentre, phase 3 trial
Source: PubMed Central journal article supplement — BMJ. 2024 Oct 23;387:e079603. doi: 10.1136/bmj-2024-079603 (PMC11497771; doi:10.1136/bmj-2024-079603), 2024-10-23
Supplement: hemi079603.ww1.pdf [file hemi079603.ww1.pdf]

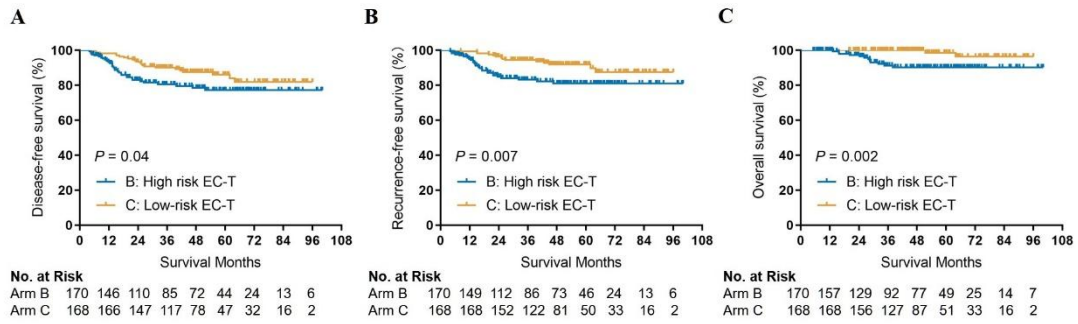

**Supplementary Figure A. Clinical outcomes among patients receiving standard treatment.** Kaplan-Meier plots show (A) disease-free survival, (B) recurrence-free survival and (C) overall survival for patients receive standard treatment. Abbreviations: EC-T, epirubicin and cyclophosphamide followed by docetaxel; No, Number.

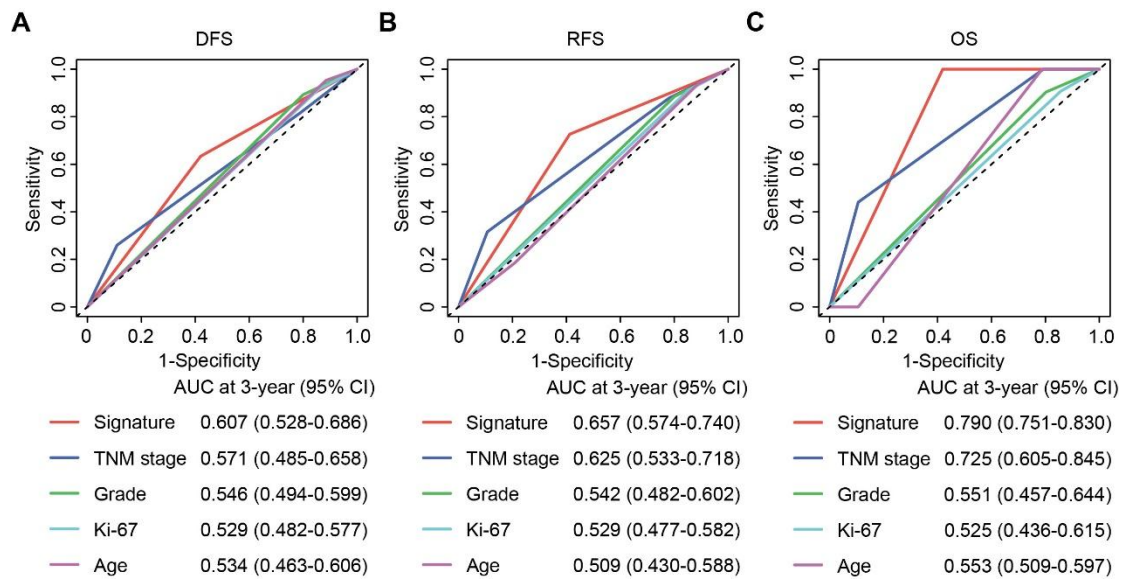

**Supplementary Figure B. Efficacy of the integrated mRNA-lncRNA signature and traditional clinicopathologic factors in determination of prognosis in the high-risk (arm B) and low-risk patients (arm C) receiving the same standard treatment.** Time-dependent receiver operating curves for (A) disease-free survival (DFS), (B) recurrence-free survival (RFS) and (C) overall survival (OS) were plotted with AUCs reported. All factors were coded as categorical variables.

**Supplementary Table A. Participating centers.**

| Number | Hospital                                                                                |
|--------|-----------------------------------------------------------------------------------------|
| 1      | Fudan University Shanghai Cancer Center                                                 |
| 2      | Chongqing Cancer Hospital, Chongqing University                                         |
| 3      | Northern Jiangsu People's Hospital                                                      |
| 4      | Fujian Medical University Union Hospital                                                |
| 5      | Shanghai First Maternity and Infant Hospital                                            |
| 6      | Obstetrics and Gynecology Hospital of Fudan University                                  |
| 7      | The International Peace Maternity & Child Health Hospital of<br>China Welfare Institute |

**Supplementary Table B. Treatment cycles and dose modifications between arm A and arm B in high-risk patients.**

|                                                        | <b>Arm A (n = 163)</b> | <b>Arm B (n = 169)</b> |                            |
|--------------------------------------------------------|------------------------|------------------------|----------------------------|
|                                                        | TEC-GP                 | EC-T                   | <b>Difference (95% CI)</b> |
|                                                        | N (%)                  | N (%)                  |                            |
| Patients who completed all planned cycles of treatment | 149 (91)               | 158 (93)               | -2 (-8 to 4)               |
| Any treatment-related adverse events (TRAEs)           | 163 (100)              | 169 (100)              | 0 (-2 to 2)                |
| Any ≥3 TRAEs                                           | 105 (64)               | 86 (51)                | 13 (3 to 24)               |
| Treatment-related SAEs                                 | 9 (6)                  | 7 (4)                  | 2 (-4 to 6)                |
| Any TRAEs leading to dose delayed                      | 47 (29)                | 33 (20)                | 9 (0 to 18)                |
| Any TRAEs leading to dose reduction                    | 51 (31)                | 25 (15)                | 16 (7 to 25)               |
| Any TEAEs leading to drug permanently discontinued     | 8 (5)                  | 5 (3)                  | 2 (-3 to 7)                |

Abbreviations: CI, confidence interval; EC-T, epirubicin and cyclophosphamide followed by docetaxel; TEC-GP, docetaxel, epirubicin, and cyclophosphamide followed by gemcitabine and cisplatin. SAE, severe adverse event. TRAE, Treatment-related adverse event.
